# Supplementary material for: An anchoring residue adjacent to the substrate access tunnel entrance of a nitrile hydratase directs its catalytic activity towards 3-cyanopyridine
Source: Royal Society of Chemistry journal article supplement (doi:10.1039/d1cy01566d), 2021-01-01
Supplement: d1cy01566d1.pdf [file d1cy01566d1.pdf]

**An anchoring residue adjacent to the substrate access tunnel  
entrance of nitrile hydratase directs its catalytic activity towards 3-  
cyanopyridine**

Zhongyi Cheng<sup>a</sup>, Weimiao Zhang<sup>a</sup>, Yuanyuan Xia<sup>a</sup>, Dong Ma<sup>a</sup> and Zhemin Zhou<sup>a,b\*</sup>

<sup>a</sup> Key Laboratory of Industrial Biotechnology (Ministry of Education), School of  
Biotechnology, Jiangnan University, Wuxi, Jiangsu, China

<sup>b</sup> Jiangnan University (Rugao) Food Biotechnology Research Institute, Rugao 226500, China

\*Corresponding author, Email: [zhmzhou@jiangnan.edu.cn](mailto:zhmzhou@jiangnan.edu.cn)

## **Materials and Methods**

### ***Strains, plasmids and chemical reagents***

The NHase gene from *Pseudonocardia thermophila* JCM3095 was synthesized and cloned to pET-24a plasmid by GENEWIZ Biotech Co., Ltd. (South Plainfield, NJ, USA). The NHases were heterologously expressed in *Escherichia coli* BL21 (DE3). 3-cyanopyridine and nicotinamide were purchased from TCI (Shanghai) Development Co., Ltd. All other chemicals were obtained commercially.

### ***Construction of mutants***

Site-directed saturation mutagenesis was performed following a whole plasmid PCR protocol<sup>1</sup>. PrimeSTAR HS DNA Polymerase from Takara Bio Inc. (Kusatsu, Japan) was used for all PCRs. The PCR mixture was described previously<sup>2</sup>. Primers were shown in Table S2.

### ***Expression and purification of enzymes***

The cultivation and expression process were the same as described in our previous study<sup>2</sup>. AKTA purifier (GE Healthcare UK Ltd., Amersham, UK) was used for enzyme purification. A StrepTrap HP column (GE Healthcare UK Ltd.) equilibrated with binding buffer (20 mM Na<sub>2</sub>HPO<sub>4</sub>·12H<sub>2</sub>O, 280 mM NaCl, 6 mM KCl, pH 7.4) was used for purifying the NHases with a Strep tag at the N terminus of the β subunit. After injecting the supernatant into the column, proteins were eluted using elution buffer (binding buffer containing 25 mM desthiobiotin, pH 7.4). The active fractions

were collected, concentrated to 500  $\mu\text{L}$  by ultrafiltration, and applied to a Superdex 200 10/300 GL column (GE Healthcare UK Ltd.).

### ***Enzymatic assay***

The specific activity of NHase was determined by the increase of the nicotinamide. The reaction mixture contained 10 mM kalium phosphate buffer (KPB) buffer (8.02 mL of 1 M  $\text{K}_2\text{HPO}_4$  buffer and 1.98 mL of 1 M  $\text{KH}_2\text{PO}_4$  buffer in 1 L ddH<sub>2</sub>O) (pH 7.4), 200 mM 3-cyanopyridine, and 10  $\mu\text{L}$  of the appropriate amount of the enzyme solution (enzyme in 10 mM KPB buffer). The reaction was carried out at 30°C for 10 min. The amide concentration was analyzed by HPLC equipped with a HITACHI C18 reverse phase column (solvent: acetonitrile/water = 1:2 (v/v)). The detection wavelength was set to 215 nm. One unit (U) of NHase activity was defined as the amount of enzyme that produced 1  $\mu\text{mol}$  amide product per minute under the above assay conditions.

For the determination of the substrate tolerance of NHase, 100% relative activity was defined as the specific activity of NHase reacted with 0.2 M 3-cyanopyridine, while the substrate tolerance of the target enzyme was defined by the relative activity of the enzyme treated with 1 M 3-cyanopyridine.

The enzyme concentration for the measurement of kinetic parameters toward 3-cyanopyridine was set to 0.2 mg/mL. The reaction mixture contained: 10  $\mu\text{L}$  purified enzyme (concentration: 0.2 mg/mL), 490  $\mu\text{L}$  3-cyanopyridine diluted in 10 mM KPB buffer (pH 7.4). The concentrations of 3-cyanopyridine were 10, 20, 50, 100, and 200

mM. The reactions were carried out under 30°C for 2 min and were terminated with 500  $\mu$ L of acetonitrile.

### ***Thermal denaturation analysis***

The half-life of target enzymes was determined by pre-incubating enzyme solutions in the absence of a substrate at 60°C for different durations. The residual enzyme activity was then measured under standard conditions described above. The half-life ( $t_{1/2}$ ) was defined as the time point at which the residual activity of NHase retained 50% of its original activity.

The melting temperature ( $T_m$ ) was defined as the temperature when half of the protein was unfolded. Differential scanning calorimetry (Nano DSC, TA Instruments, New Castle, NY, USA) was used to capture changes in energy during the protein folding and unfolding processes. Enzymes were dialyzed against potassium phosphate buffer at a concentration of 0.3 mg/mL, and the instrument was scanned up and down from 25 to 100 °C using a 1 °C/min scan rate and scanned buffer alone to obtain background measurements. The heat capacity results were analyzed using the Nano DSC analysis software, and the  $T_m$  was calculated from a fitted curve.

### ***Computational design of NHase***

The 3-dimensional structure of the NHase mutant was constructed using the trRosetta online tool<sup>3</sup>. VERIFY3D and PROCHECK were applied to evaluate the constructed model<sup>4, 5</sup>. The docking of 3-cyanopyridine to the active site of WT *Pt*NHase and its mutant were evaluated using Glide<sup>6</sup>. Molecular dynamics (MD) simulations were

performed using NAMD 2.14 with the Charmm27 force field for 100 ns<sup>7</sup>. The proteins were put into a cubic water box ( $73 \times 75 \times 88 \text{ \AA}^3$ ) with a layer of water of at least 10  $\text{\AA}$  in each dimension. A cutoff of 12  $\text{\AA}$  for non-bonded interactions was applied. To account for nonstandard amino acids and cobalt III ions at the active site that cannot fit the Charmm27 force field, our previously determined parameters were used.<sup>2</sup> The substrate access tunnel and the size of tunnel entrance were calculated and analyzed using CAVER analyst 2.0<sup>8</sup>. The Min. probe radius was 0.9  $\text{\AA}$  and the shell depth was 4  $\text{\AA}$ . The tunnel starting point was the geometric center of the NHase active site. CaverWeb was used for calculating the binding energies between substrate 3-cyanopyrindine and NHase during substrate transport<sup>9</sup>.

**Table S1.** Interactions between residue  $\beta$ Glu50 and its surrounding residues in WT *Pt*NHase and its  $\beta$ E50L mutant.

| WT (4 hbonds)      |                    |                          | E50L (3 hbonds)    |                    |           |
|--------------------|--------------------|--------------------------|--------------------|--------------------|-----------|
| Donor              | Acceptor           | Occupancy <sup>[a]</sup> | Donor              | Acceptor           | Occupancy |
| $\beta$ GLY54-Main | $\beta$ GLU50-Main | 15.06%                   | $\beta$ GLY54-Main | $\beta$ LEU50-Main | 19.90%    |
| $\beta$ GLY47-Main | $\beta$ GLU50-Side | 13.76%                   | $\beta$ LEU50-Main | $\beta$ GLY47-Main | 0.14%     |
| $\beta$ GLU50-Main | $\beta$ GLY47-Main | 0.08%                    | $\beta$ PHE53-Main | $\beta$ LEU50-Main | 0.01%     |
| $\beta$ GLU50-Main | $\beta$ ASP49-Side | 2.59%                    |                    |                    |           |

<sup>[a]</sup> The time occupancy of the hbonds during the whole 100 ns MD simulation.

The detailed information of hydrogen bonds was calculated by the ‘Hydrogen Bonds’ plugin in VMD based on the MD trajectories.

**Table S2.** Primers used in present study.

---

| Primers               | Sequence (5'-3')                                     |
|-----------------------|------------------------------------------------------|
| $\beta$ R42G-Foward   | GCCATGTTTCCGGCAACCTTT <u>GGT</u> GCAGGTTTTAAAGGTCTG  |
| $\beta$ R42A-Foward   | GCCATGTTTCCGGCAACCTTT <u>GCAG</u> GCAGGTTTTAAAGGTCTG |
| $\beta$ R42V-Foward   | GCCATGTTTCCGGCAACCTTT <u>GTT</u> GCAGGTTTTAAAGGTCTG  |
| $\beta$ R42L-Foward   | GCCATGTTTCCGGCAACCTTT <u>CTG</u> GCAGGTTTTAAAGGTCTG  |
| $\beta$ R42I-Foward   | GCCATGTTTCCGGCAACCTTT <u>ATT</u> GCAGGTTTTAAAGGTCTG  |
| $\beta$ R42M-Foward   | GCCATGTTTCCGGCAACCTTT <u>ATG</u> GCAGGTTTTAAAGGTCTG  |
| $\beta$ R42C-Foward   | GCCATGTTTCCGGCAACCTTT <u>TGT</u> GCAGGTTTTAAAGGTCTG  |
| $\beta$ Arg42-Reverse | TTCATCCAGACCTTTAAAACCTGC                             |
| $\beta$ E50G-Foward   | GCAGGTTTTAAAGGTCTGGAT <u>GGT</u> TTTCGTTTTGGCATTGAA  |
| $\beta$ E50A-Foward   | GCAGGTTTTAAAGGTCTGGAT <u>GCA</u> TTTCGTTTTGGCATTGAA  |
| $\beta$ E50V-Foward   | GCAGGTTTTAAAGGTCTGGAT <u>GTT</u> TTTCGTTTTGGCATTGAA  |
| $\beta$ E50L-Foward   | GCAGGTTTTAAAGGTCTGGAT <u>CTG</u> TTTCGTTTTGGCATTGAA  |
| $\beta$ E50I-Foward   | GCAGGTTTTAAAGGTCTGGAT <u>ATT</u> TTTCGTTTTGGCATTGAA  |
| $\beta$ E50M-Foward   | GCAGGTTTTAAAGGTCTGGAT <u>ATG</u> TTTCGTTTTGGCATTGAA  |
| $\beta$ E50C-Foward   | GCAGGTTTTAAAGGTCTGGAT <u>TGT</u> TTTCGTTTTGGCATTGAA  |

---

---

| Primers               | Sequence (5'-3')                                    |
|-----------------------|-----------------------------------------------------|
| $\beta$ Glu50-Reverse | CATCTGTTCAATGCCAAAACGAAA                            |
| $\beta$ R82G-Foward   | ACCTATATTCATCATGGCGTG <u>GGT</u> ACCGGTAAAATTGATCTG |
| $\beta$ R82A-Foward   | ACCTATATTCATCATGGCGTG <u>GCA</u> ACCGGTAAAATTGATCTG |
| $\beta$ R82V-Foward   | ACCTATATTCATCATGGCGTG <u>GTT</u> ACCGGTAAAATTGATCTG |
| $\beta$ R82L-Foward   | ACCTATATTCATCATGGCGTG <u>CTG</u> ACCGGTAAAATTGATCTG |
| $\beta$ R82I-Foward   | ACCTATATTCATCATGGCGTG <u>ATT</u> ACCGGTAAAATTGATCTG |
| $\beta$ R82M-Foward   | ACCTATATTCATCATGGCGTG <u>ATG</u> ACCGGTAAAATTGATCTG |
| $\beta$ R82C-Foward   | ACCTATATTCATCATGGCGTG <u>TGT</u> ACCGGTAAAATTGATCTG |
| $\beta$ Arg82-Reverse | TTCTTCCAGATCAATTTTACCGGT                            |
| $\beta$ E114G-Foward  | CCGCGCCATGAACAGAAACCG <u>GGT</u> CTGATTGAATTTGTGAAT |
| $\beta$ E114A-Foward  | CCGCGCCATGAACAGAAACCG <u>GCA</u> CTGATTGAATTTGTGAAT |
| $\beta$ E114V-Foward  | CCGCGCCATGAACAGAAACCG <u>GTT</u> CTGATTGAATTTGTGAAT |
| $\beta$ E114L-Foward  | CCGCGCCATGAACAGAAACCG <u>CTG</u> CTGATTGAATTTGTGAAT |
| $\beta$ E114I-Foward  | CCGCGCCATGAACAGAAACCG <u>ATT</u> CTGATTGAATTTGTGAAT |
| $\beta$ E114M-Foward  | CCGCGCCATGAACAGAAACCG <u>ATG</u> CTGATTGAATTTGTGAAT |

---



---

| Primers                | Sequence (5'-3')                                           |
|------------------------|------------------------------------------------------------|
| $\beta$ E114C-Foward   | CCGCGCCATGAACAGAAACCG <b><u>TGT</u></b> CTGATTGAATTTGTGAAT |
| $\beta$ Glu114-Reverse | GGCCTGATTCACAAATTC AATCAG                                  |

---

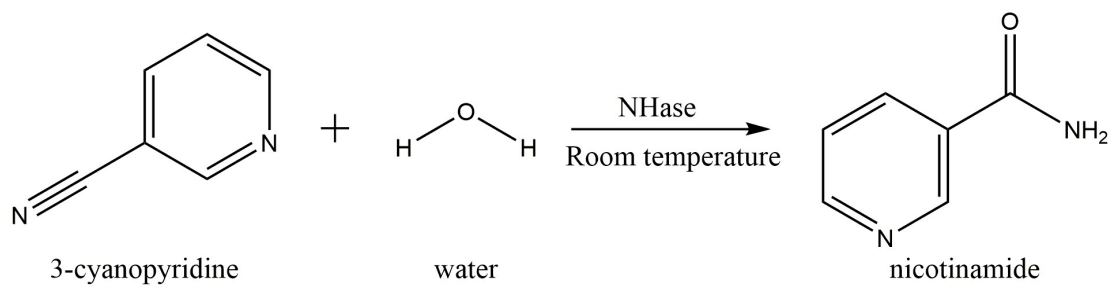

**Scheme S1** Hydration of 3-cyanopyridine for the production of nicotinamide with NHase.

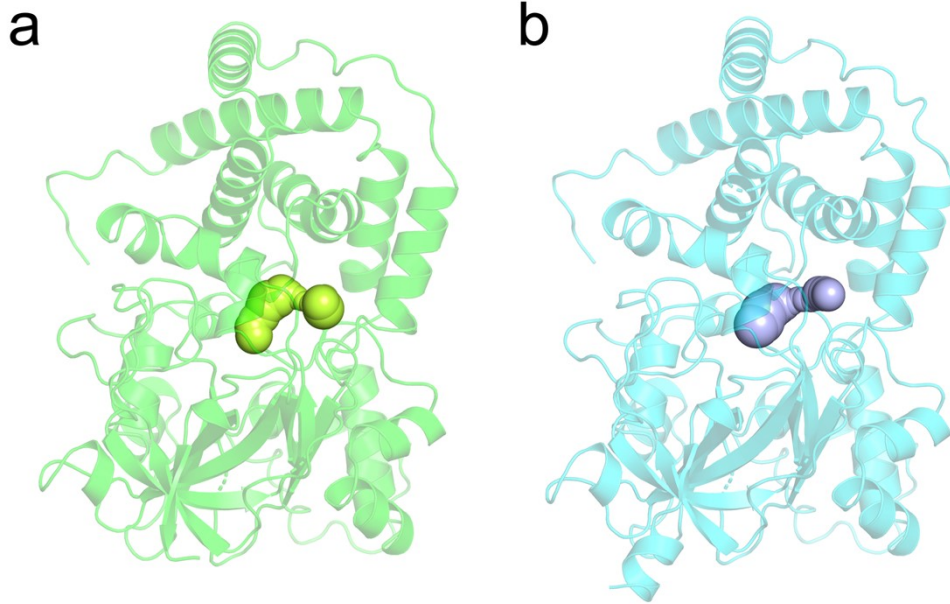

**Fig. S1** Cartoon model of the substrate access tunnel of a) WT *PtNHase* and its b)  $\beta$ E50L mutant. Tunnels are shown as spheres.

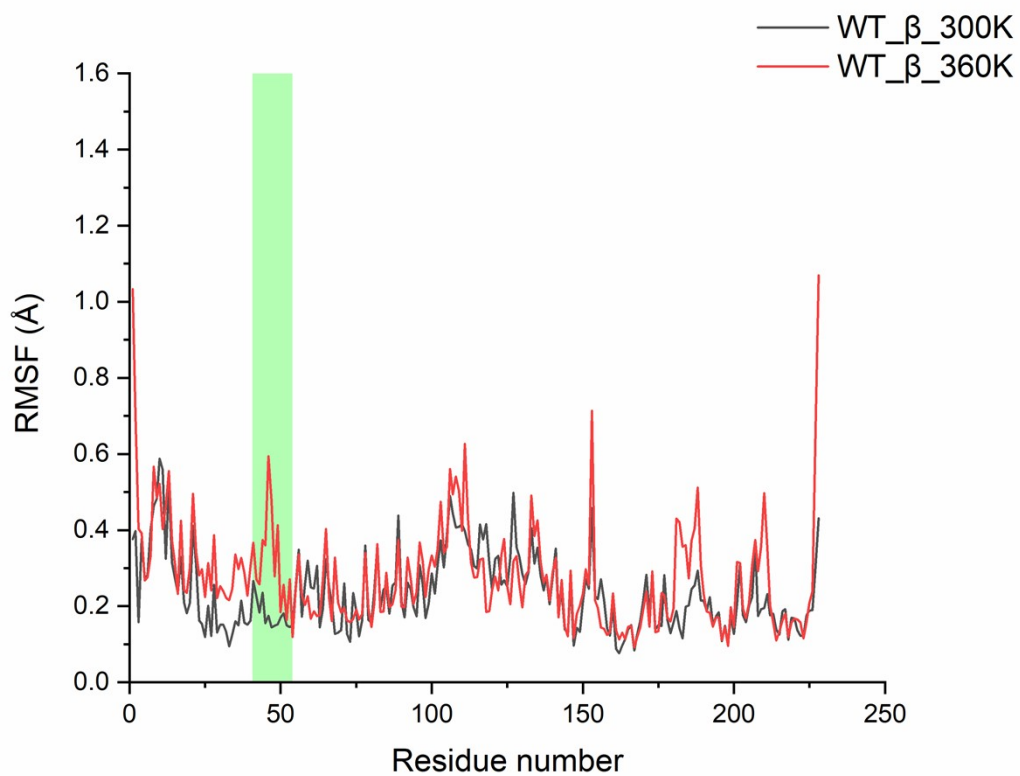

**Fig. S2** Comparison of RMSF values of the  $\beta$  subunit of *Pt*NHase under different temperatures. The loop region was highlighted in green.

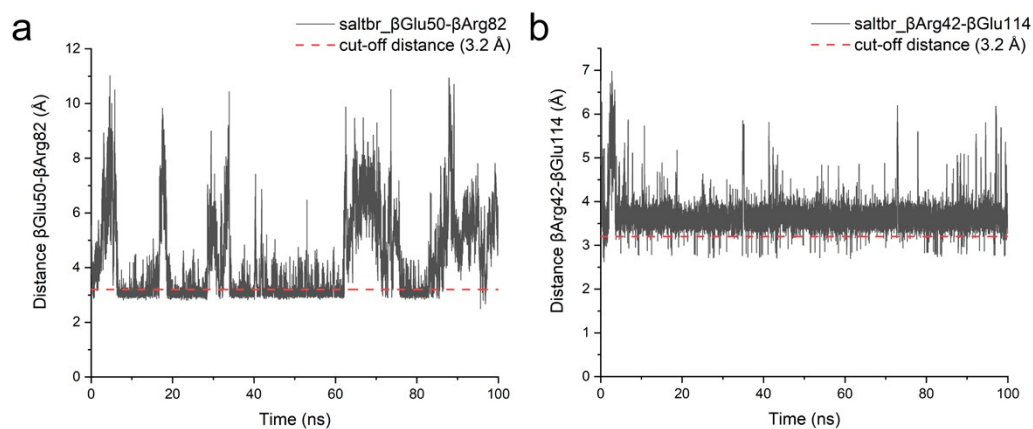

**Fig. S3** Salt bridge analysis. a) The distance between  $\beta$ Glu50 and  $\beta$ Arg82 of *Pt*NHase during 100 ns MD simulation. b) The distance between  $\beta$ Arg42 and  $\beta$ Glu114 of *Pt*NHase during 100 ns MD simulation.

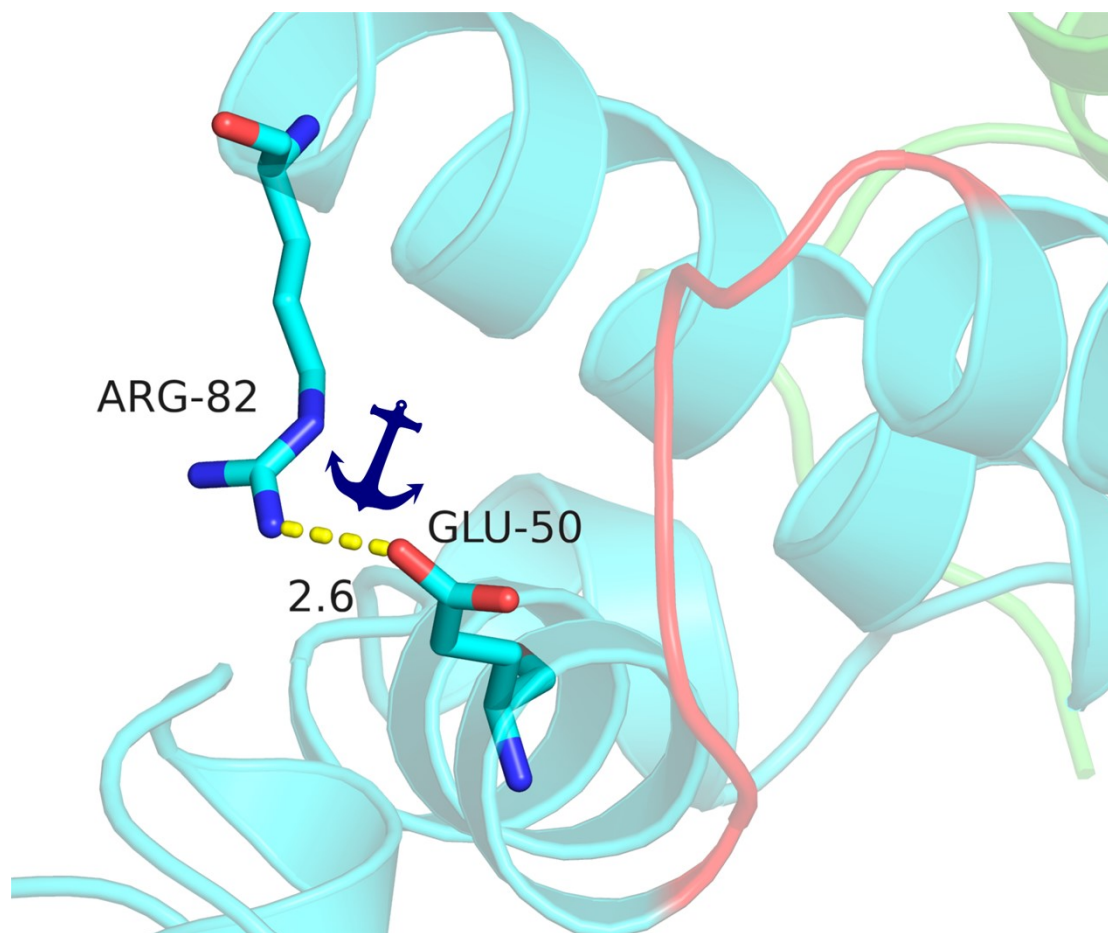

**Fig. S4** Salt bridge formed between the anchoring residue  $\beta$ Glu50 and its surrounding residue  $\beta$ Arg82 of the WT *Pt*NHase. Salt bridge was shown in yellow dashed line.

## ConSurf Results

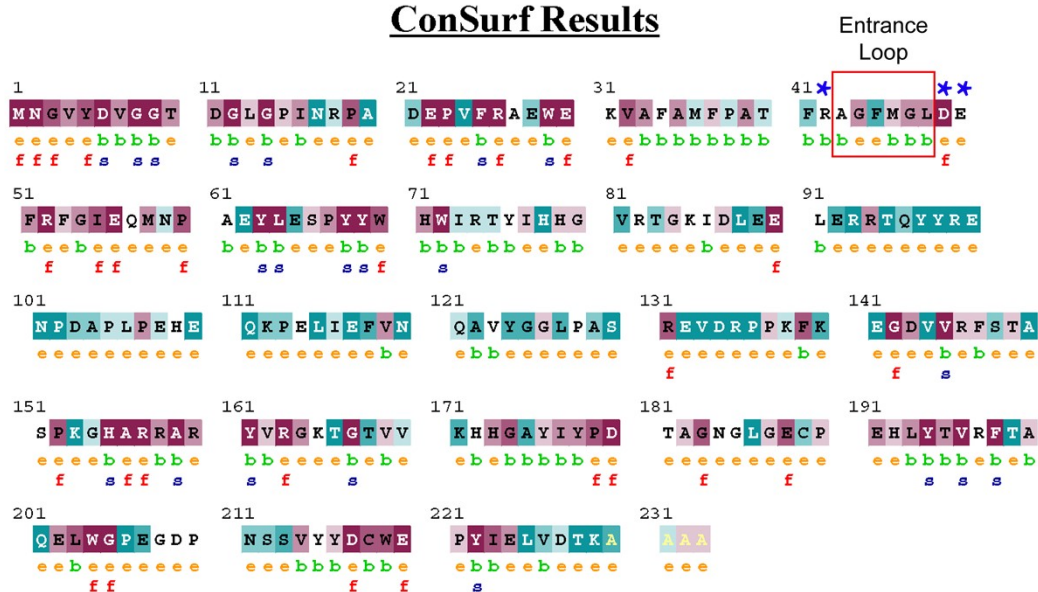

The conservation scale:

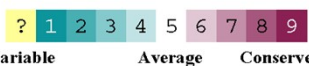

- e - An exposed residue according to the neural-network algorithm.
- b - A buried residue according to the neural-network algorithm.
- f - A predicted functional residue (highly conserved and exposed).
- s - A predicted structural residue (highly conserved and buried).
- \* - Insufficient data - the calculation for this site was performed on less than 10% of the sequences.

**Fig. S5** Residue conservative analysis of  $\beta$  subunit of *Pti*NHase using ConSurf. The substrate access tunnel entrance loop region was circled in red. The potential anchoring residues were marked as blue stars.

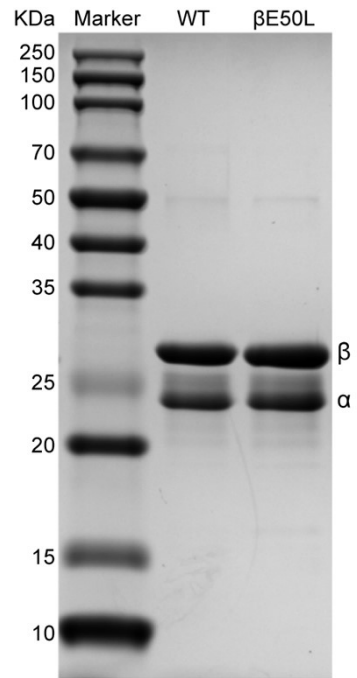

**Fig. S6** SDS-PAGE of the purified WT PtNHase and its  $\beta$ E50L mutant.



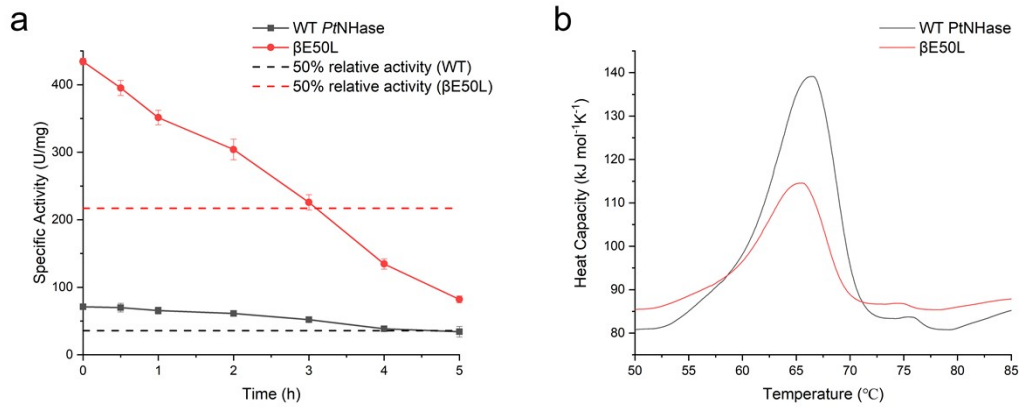

**Fig. S7** Determination of the a) half-life time and b) melting temperature of the WT *PtNHase* and its  $\beta$ E50L mutant. The half-life of target enzymes was determined by pre-incubating enzyme solutions (10 mM kalium phosphate buffer (8.02 mL of 1 M  $K_2HPO_4$  buffer and 1.98 mL of 1 M  $KH_2PO_4$  buffer in 1 L ddH<sub>2</sub>O, pH 7.4)) in the absence of a substrate at 60°C for different durations.

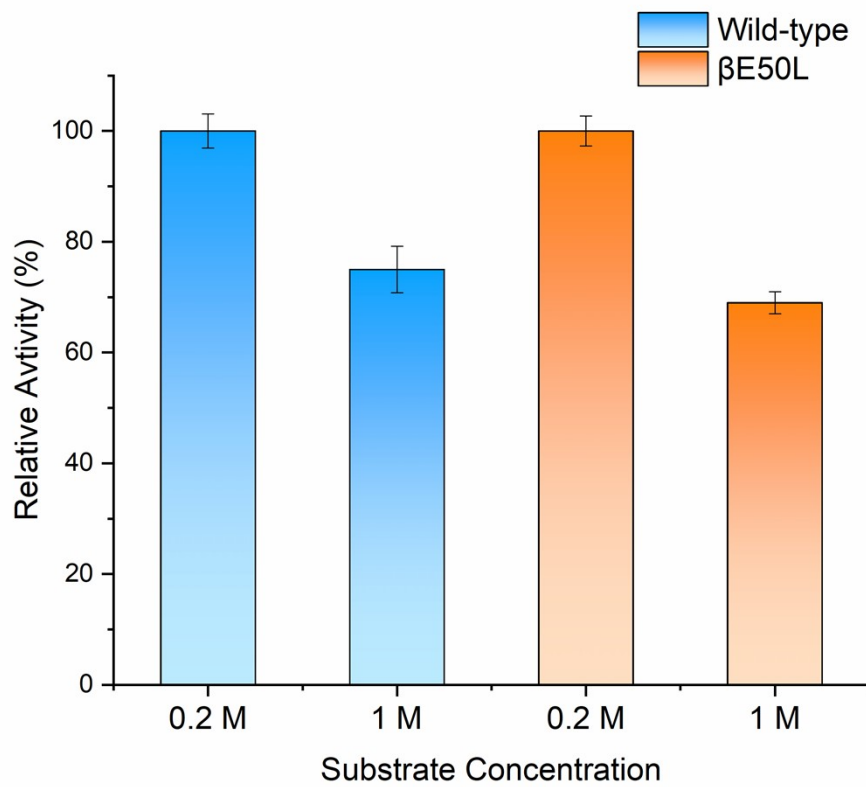

**Fig. S8** Relative activity of the WT *PtNHase* and its  $\beta$ E50L mutant under the treatment of 1 M 3-cyanopyridine.

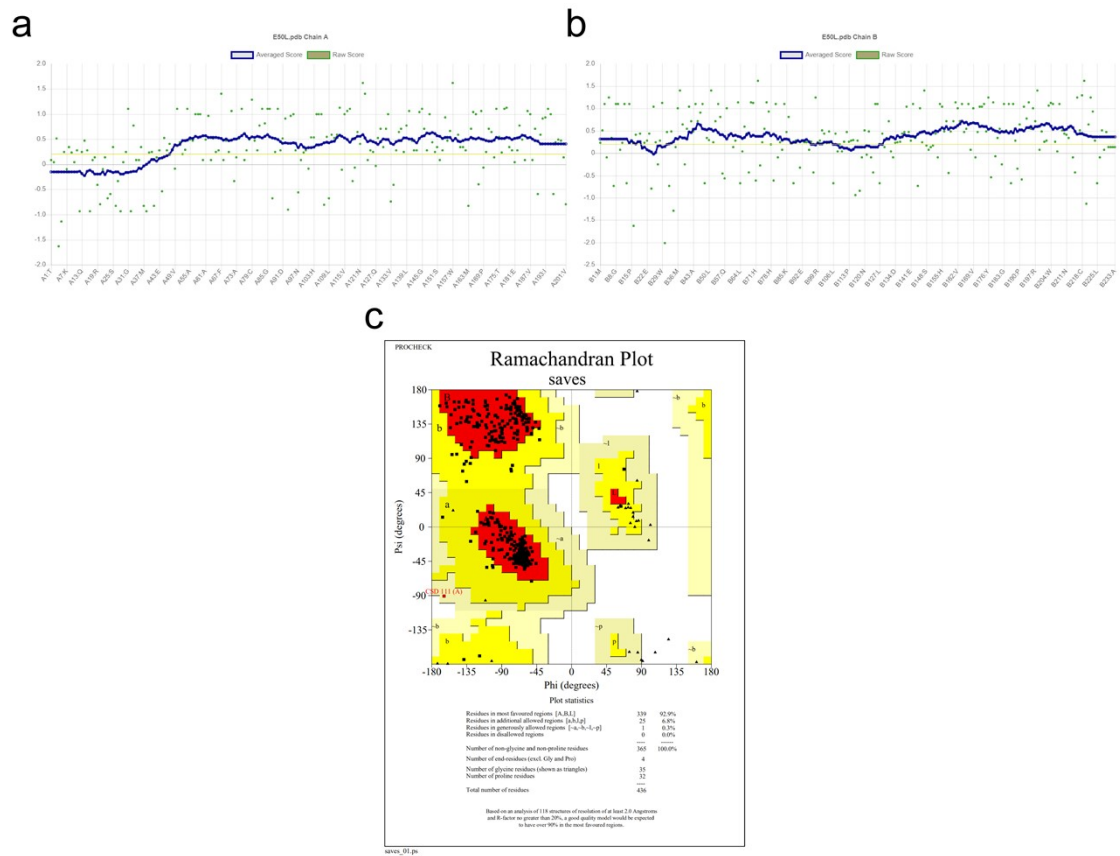

**Fig. S9** Structure evaluation of the constructed  $\beta$ E50L mutant model by VERIFY3D on a) the  $\alpha$  subunit, b) the  $\beta$  subunit and c) the Ramachandran plot of the model.

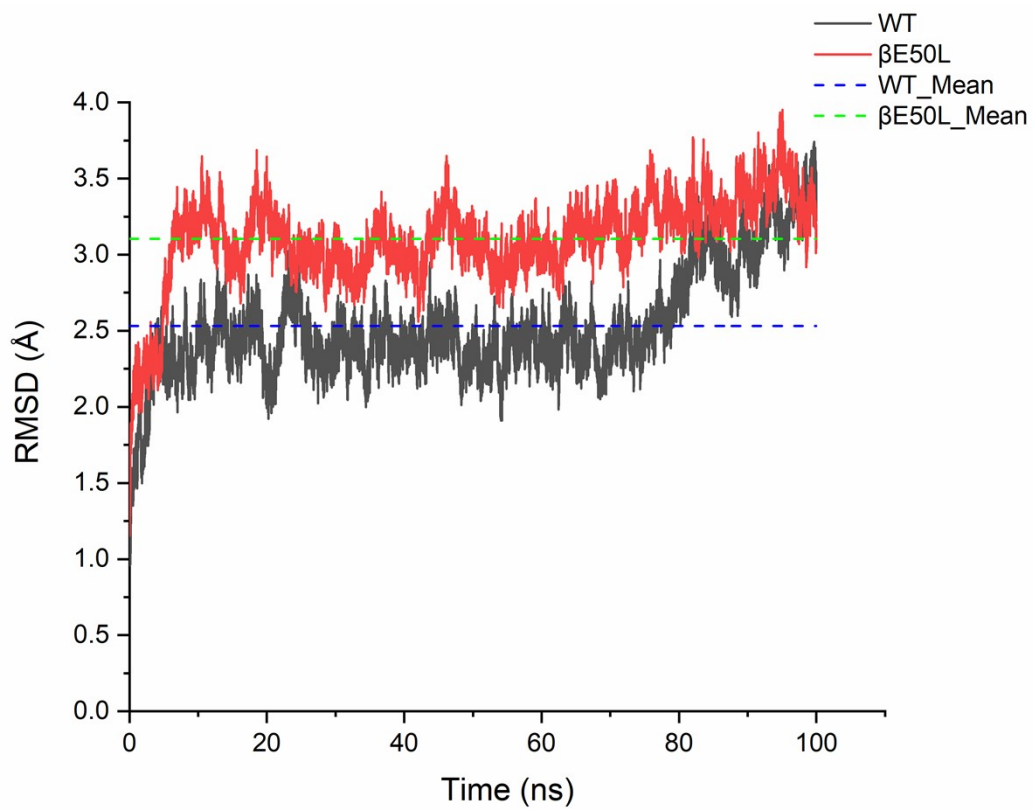

**Fig. S10** RMSD values for simulation of WT *Pt*NHase and its βE50L mutant at 300 K

## References

1. M. Laible and K. Boonrod, *Journal of visualized experiments : JoVE*, 2009, DOI: 10.3791/1135.
2. Z. Cheng, Y. Lan, J. Guo, D. Ma, S. Jiang, Q. Lai, Z. Zhou and L. Peplowski, *Molecules*, 2020, **25**.
3. J. Yang, I. Anishchenko, H. Park, Z. Peng, S. Ovchinnikov and D. Baker, *Proceedings of the National Academy of Sciences of the United States of America*, 2020, **117**, 1496-1503.
4. J. U. Bowie, R. Lüthy and D. Eisenberg, *Science (New York, N.Y.)*, 1991, **253**, 164-170.
5. R. A. Laskowski, J. A. Rullmann, M. W. MacArthur, R. Kaptein and J. M. Thornton, *Journal of biomolecular NMR*, 1996, **8**, 477-486.
6. J. Bhachoo and T. Beuming, *Methods in molecular biology (Clifton, N.J.)*, 2017, **1561**, 235-254.
7. J. C. Phillips, R. Braun, W. Wang, J. Gumbart, E. Tajkhorshid, E. Villa, C. Chipot, R. D. Skeel, L. Kalé and K. Schulten, *Journal of computational chemistry*, 2005, **26**, 1781-1802.
8. A. Jurcik, D. Bednar, J. Byska, S. M. Marques, K. Furmanova, L. Daniel, P. Kokkonen, J. Brezovsky, O. Strnad, J. Stourac, A. Pavelka, M. Manak, J. Damborsky and B. Kozlikova, *Bioinformatics (Oxford, England)*, 2018, **34**, 3586-3588.
9. J. Stourac, O. Vavra, P. Kokkonen, J. Filipovic, G. Pinto, J. Brezovsky, J. Damborsky and D. Bednar, *Nucleic acids research*, 2019, **47**, W414-w422.
